ORIGINAL ARTICLE

# Aberrant Detergent-Insoluble Excitatory Amino Acid Transporter 2 Accumulates in Alzheimer Disease

Randall L. Woltjer, MD, PhD, Kevin Duerson, PhD, Joseph M. Fullmer, MD, PhD, Paramita Mookherjee, PhD, Allison M. Ryan, Thomas J. Montine, MD, PhD, Jeffrey A. Kaye, MD, Joseph F. Quinn, MD, Lisa Silbert, MD, MCR, Deniz Erten-Lyons, MD, James B. Leverenz, MD, Thomas D. Bird, MD, David V. Pow, PhD, Kohichi Tanaka, MD, PhD, G. Stennis Watson, PhD, and David G. Cook, PhD

## Abstract

Alzheimer disease (AD) is characterized by deposition of amyloid- $\beta$ , tau, and other specific proteins that accumulate in the brain in detergent-insoluble complexes. Alzheimer disease also involves glutamatergic neurotransmitter system disturbances. Excitatory amino acid transporter 2 (EAAT2) is the dominant glutamate transporter in cerebral cortex and hippocampus. We investigated whether accumulation of detergent-insoluble EAAT2 is related to cognitive impairment and neuropathologic changes in AD by quantifying detergent-insoluble EAAT2 levels in hippocampus and frontal cortex of cognitively normal patients, patients with clinical dementia rating of 0.5 (mildly impaired), and AD patients. Parkinson disease patients served as neurodegenerative disease controls. We found that Triton X-100-insoluble EAAT2 levels were significantly increased in patients with AD compared with controls, whereas Triton X-100-insoluble EAAT2 levels in patients with clinical dementia rating of 0.5 were intermediately elevated between control and AD subjects. Detergent insolubility of presenilin-1, a structurally similar protein, did

not differ among the groups, thus arguing that EAAT2 detergent insolubility was not caused by nonspecific cellular injury. These findings demonstrate that detergent-insoluble EAAT2 accumulation is a progressive biochemical lesion that correlates with cognitive impairment and neuropathologic changes in AD. These findings lend further support to the idea that dysregulation of the glutamatergic system may play a significant role in AD pathogenesis.

**Key Words:** Glutamate, Alzheimer disease, EAAT2, Excitotoxicity, Mild cognitive impairment, Protein aggregation, Oxidative stress, SLC1A2.

## INTRODUCTION

Aberrant glutamate stimulation has been proposed as a mechanism by which synapses and neurons are injured in Alzheimer disease (AD) (1). Excitatory amino acid transporter 2 ([EAAT2] also called *GLT-1*) is the major glutamate transporter in the forebrain that is responsible for a number of essential neuroprotective and regulatory functions that include preventing glutamate-mediated injury to neurons and synapses and regulating normal synaptic input specificity (2–5). Several reports indicate that EAAT2 levels are significantly reduced in AD (6–8), thus raising the possibility that glutamate dyshomeostasis plays a role in AD pathogenesis. In addition, EAAT2 is oxidatively damaged by exposure to amyloid- $\beta$  ( $A\beta$ ) (9–13). Excitatory amino acid transporter 2 oxidation impairs glutamate uptake and promotes the formation of high-molecular weight EAAT2 oligomers that are insoluble in detergents such as Triton X-100 (14–16).

These findings suggest that AD pathogenesis may disrupt EAAT2 via mechanisms that recapitulate those of other key AD-related molecules, most notably  $A\beta$ , which undergoes oxidation, misfolding, and aggregation. Although the studies previously cited establish that EAAT2 is biochemically and functionally damaged by  $A\beta$ -related processes, the potential disease relevance of these findings has not been examined in AD patients. There currently is little evidence at the protein level on the relationship between aberrant EAAT2 expression and the degree of cognitive loss and associated AD pathology. To address this important issue, we measured Triton X-100-insoluble and Triton X-100-soluble

From the Department of Pathology (RLW, AMR), Oregon Health & Sciences Univ., Portland, Oregon; Geriatric Research Education and Clinical Center (KD, TDB, SW, DGC), VA Medical Center (VAPSHCS), Seattle, Washington; Department of Pathology (JMF), University of Wisconsin, Madison, Wisconsin; Department of Pathology (PM, TJM), University of Washington, Seattle, Washington; Department of Neurology (JAK, JFQ, LS, DE-L), Oregon Health & Sciences University, Portland, Oregon; Research and Development Service (DE-L), VA Medical Center, Portland, Oregon; Department of Neurology (JBL, TDB), University of Washington, Seattle, Washington; U.Q. Centre for Clinical Research (DVP), Royal Brisbane and Women's Hospital, Brisbane, Australia; Laboratory of Molecular Neuroscience (KT), School of Biomedical Science and Medical Research Institute, Tokyo Medical and Dental University, Tokyo, Japan; Department of Psychiatry and Behavioral Sciences (GSW), University of Washington, Seattle, Washington; and Departments of Medicine and Pharmacology (DGC), University of Washington, Seattle, Washington.

Send correspondence and reprint requests to: David G. Cook, PhD, VA Medical Center, Geriatric Research Education and Clinical Center, 1660 S. Columbian Way, Seattle, WA 98108; E-mail: dgcook@u.washington.edu  
This study was supported by the Veteran's Affairs Office of Research and Development Medical Research Service (David Cook); by NIH institutional fellowships to Kevin Duerson, Joseph Fullmer (T32 AG000258), and Paramita Mookherjee (T32 AG00057-31); by the University of Washington Alzheimer's Disease Research Center (AG5036); and by the Oregon Alzheimer's Disease Center (5P30AG008017).

EAAT2 in the hippocampus and frontal cortex of more than 100 clinically and pathologically well-characterized normal controls, patients with a Clinical Dementia Rating (CDR) of 0.5 (17), and later-stage AD patients.

## MATERIALS AND METHODS

### Patients

Subjects were from the Alzheimer's Disease Center, Oregon Health and Sciences University, and Alzheimer's Disease Research Center at the University of Washington (Table). Control subjects and subjects with a CDR = 0.5 (intended to approximate mild cognitive impairment) were participants in brain aging studies at the Oregon Aging/Alzheimer's Disease Center. Subjects received annual neurological and neuropsychological evaluation, with CDR assigned by an experienced clinician. Controls had normal cognitive and functional examinations. Subjects with a CDR = 0.5 were functionally intact on enrollment and progressed to a global CDR = 0.5 (no subscores >0.5) at their last evaluation, within a year of autopsy. The AD subjects were diagnosed by a clinical team consensus conference, met National Institute for Neurological and Communicative Disorders and Stroke-Alzheimer's Disease and Related Disorder Association diagnostic criteria for clinical AD, had a CDR of greater than 1.0, and neuropathologic confirmation at autopsy (after informed consent). Tissue use conformed to institutional review board-approved protocols. Neuropathologic assessment conformed to National Institute on Aging-Reagan consensus criteria (18). The AD group included subjects with probable AD, moderate-to-frequent neuritic plaques, and Braak stages V to VI neurofibrillary tangles (NFTs). Controls were clinically nondemented subjects with sparse or no neuritic plaques and NFTs less than or equal to Braak stage II. The AD patients and controls with Lewy body disease involving the brainstem (including substantia nigra), amygdala, middle frontal gyrus, and patients with vascular brain disease manifested by grossly observed arterial territorial infarcts, grossly observed lacunar infarcts, or microvascular infarcts were excluded. Parkinson disease (PD) patients had the expected clinical signs, symptoms, and midbrain—but not cerebral cortex—Lewy body pathology.

### ELISAs

Brain samples were homogenized, sequentially extracted in 10 mmol/L Tris, 1 mmol/L ethylene glycol tetraacetic acid, 1 mmol/L dithiothreitol, 10% sucrose, and then extracted 3× with 1% Triton X-100, as previously described (19). Remaining detergent-insoluble material was extracted with 70% formic acid. Formic acid extracts of detergent-insoluble proteins were resolubilized and adsorbed onto 96-well plates as described elsewhere (19). The EAAT2/GLT-1 was detected with antibodies AB12 and GLT-1A (20). Presenilin-1 (PS1) was detected with PS1 N-terminal fragment antisera (21). Amyloid-β was detected with 4G8 (Covance/Signet Laboratories, Dedham, MA). Total tau was detected using anti-tau antibody (Dako, Carpinteria, CA). The ELISA plates were developed using standard methods with horseradish peroxidase-conjugated antibodies and tetramethylbenzidine substrate.

### Immunohistochemistry and Biochemistry

Standard immunohistochemical methods were used to evaluate EAAT2 staining in paraffin-embedded postmortem brain sections. Slides were incubated with AB12 and developed using 3,3'-diaminobenzidine (Vector Laboratories, Burlingame, CA). Double immunostaining labeled EAAT2 (DAB brown chromogen) and either total tau ([Tau-2] Sigma, St Louis, MO) or Ab (4G8) labeled with Vector Red (Vector Laboratories). Counterstains were omitted in double label experiments. A Nikon Optiphot-2 microscope/Insight QE digital camera was used. Image acquisition was performed using Spot imaging software (Diagnostics Instruments, Sterling Heights, MI) and formatted with Photoshop. For each experiment, images were acquired and digitally processed under identical conditions. Digital image processing was limited to linear brightness and contrast adjustments, which were performed identically on experimental and control images.

Mouse brain extracts were solubilized in Laemmli sample buffer. Total Triton X-100-soluble protein concentrations were determined by the BCA method (Pierce, Rockford, IL) and Western blotted with AB12 or GLT-1A and detected using horseradish peroxidase-conjugated antibodies and chemiluminescence.

**TABLE.** Patient Demographic and Pathological Characteristics

| Group          | n  | M/F | Age, years | PMI, hours | CERAD Score                  | Braak Stage |
|----------------|----|-----|------------|------------|------------------------------|-------------|
| Hippocampus    |    |     |            |            |                              |             |
| AD             | 22 | 6:5 | 84.3 ± 2.2 | 11.4 ± 1.4 | Frequent (moderate-frequent) | VI (V-VI)   |
| CDR = 0.5      | 14 | 7:8 | 88.9 ± 2.2 | 13.0 ± 2.0 | Sparse (none-frequent)       | IV (I-VI)   |
| Norm           | 13 | 8:5 | 87.0 ± 1.7 | 9.8 ± 1.3  | Sparse (none-sparse)         | II (I-III)  |
| PD             | 4  | 1:1 | 81.0 ± 5.7 | 17.8 ± 2.2 | Sparse (none-sparse)         | II (II-III) |
| Frontal cortex |    |     |            |            |                              |             |
| AD             | 55 | 6:5 | 82.7 ± 1.3 | 11.6 ± 0.8 | Frequent (sparse-frequent)   | VI (V-VI)   |
| CDR = 0.5      | 23 | 1:1 | 90.4 ± 1.8 | 12.5 ± 1.4 | Sparse (none-frequent)       | III (I-VI)  |
| Norm           | 20 | 2:3 | 90.1 ± 1.7 | 11.2 ± 1.2 | None (non-sparse)            | II (I-III)  |
| PD             | 4  | 3:1 | 84.9 ± 3.7 | 10.5 ± 4.3 | None (none-sparse)           | II (I-III)  |

AD, Alzheimer disease; CDR, Clinical Dementia Rating; Norm, normal controls; PD, Parkinson disease; M/F, male-female ratio; Age, age at death; PMI, postmortem interval; CERAD, Consortium to Establish a Registry for Alzheimer Disease.

## Liquid Chromatography-Tandem Mass Spectrometry

Equal amounts of formic acid–extracted protein were prepared from 5 AD subjects (mean age, 80 years; 3 women and 2 men; Consortium to Establish a Registry for Alzheimer Disease [CERAD] neuropsychological battery score, moderate or frequent; Braak stage VI), pooled, dried, dissolved in bicarbonate buffer, reduced, and treated with iodoacetamide before being subjected to trypsin digestion, as previously described (22). Eluted peptides were resuspended in 0.1% formic acid, separated by 2-dimensional microcapillary high-performance liquid chromatography, and amino acid sequences of separated peptides were determined by tandem mass spectrometry (ThermoFinnigan, San Jose, CA). Proteins from the mixture were identified automatically using the SEQUEST program, which searched spectral data against the International Protein Database. Sensitivity and specificity of protein identifications were determined by PeptideProphet and ProteinProphet as previously described (22).

## Statistics

Data were analyzed with analysis of variance, Pearson correlation tests, and Fisher exact tests using SPSS 15.0 (SPSS, Chicago, IL). We predicted that detergent-insoluble EAAT2 would be highest in later-stage AD cases, lower in cases with a CDR = 0.5, and lowest in normal controls and PD patients lacking concurrent AD pathology. To test specifically this a priori prediction, well-established analysis of variance trend analyses methods (23, 24) were used with the trend weights -2, -2, 1, and 3 corresponding to the PD, normal controls, CDR = 0.5, and AD groups, respectively. In keeping with accepted methods, these trend weights were selected because they are orthogonal integers (sum to 0) and represent the originally predicted relationships among the study groups (23, 24). Specifically, we predicted that the levels of insoluble EAAT2 in the PD and normal control groups would be both comparable to each other and lower than the other 2 groups (-2, -2 for PD and normal controls, respectively). The insoluble EAAT2 levels of the CDR = 0.5 group were predicted to be higher than PD and normal controls but lower than the AD group, whereas the AD group was expected to have the highest insoluble EAAT2 levels (+1, +3 for the CDR = 0.5 and AD groups, respectively). These trend analyses followed only statistically significant omnibus analysis of variance results. Because this was the only trend predicted a priori, no other trend analysis was attempted.

## RESULTS

### Case Material

Among the hippocampal sample AD, CDR = 0.5 (intended to approximate mild cognitive impairment [MCI]), normal control, and PD subject groups studied, differences in male-female ratios, postmortem intervals, and ages at death were not statistically significant (Fisher exact tests [9] = 0.993,  $F_{3,49} = 1.770$ , and  $F_{3,49} = 1.149$ , respectively). Group differences in CERAD scores and Braak stages were significant (Fisher exact tests [9] = 46.385,  $p < 0.00001$ ;  $F_{18} = 71.067$ ,  $p < 0.00001$ , respectively). For the frontal cortex

subject sample group, differences in the male-female ratios and postmortem intervals were not significant (Fisher exact tests [3] = 2.646 and  $F_{3,98} = 0.245$ , respectively). Ages at death were statistically significant ( $F_{3,98} = 5.708$ ,  $p < 0.001$ ) because primarily of the AD patients who tended to die earlier than other subjects. As expected, CERAD scores and Braak stages were statistically significant among the groups (Fisher exact test [9] = 87.238,  $p < 0.00001$ ;  $F_{18} = 115.049$ ,  $p < 0.00001$ , respectively) (Table).

## Detection of Detergent-Insoluble EAAT2 in AD by Mass Spectrometry

To examine whether detergent-insoluble EAAT2 accumulates in AD, we performed mass spectrometry on tryptic digests of total detergent-insoluble proteins pooled from 5 autopsy-confirmed AD patients. A total of 348 statistically significant ( $p < 0.05$ ) sequence-to-spectra matches corresponding to EAAT2 tryptic peptide fragments were identified (Fig. 1A). These fragments clustered in 6 primary domains located throughout EAAT2 (Fig. 1B), suggesting that the entire molecule was represented in the detergent-insoluble protein fractions.

These data confirm that Triton X-100–insoluble EAAT2 is present in the brains of AD patients. Despite the structural accuracy of liquid chromatography tandem mass spectrometry, this approach is not well suited for quantitative comparisons between affected and control subjects. To examine

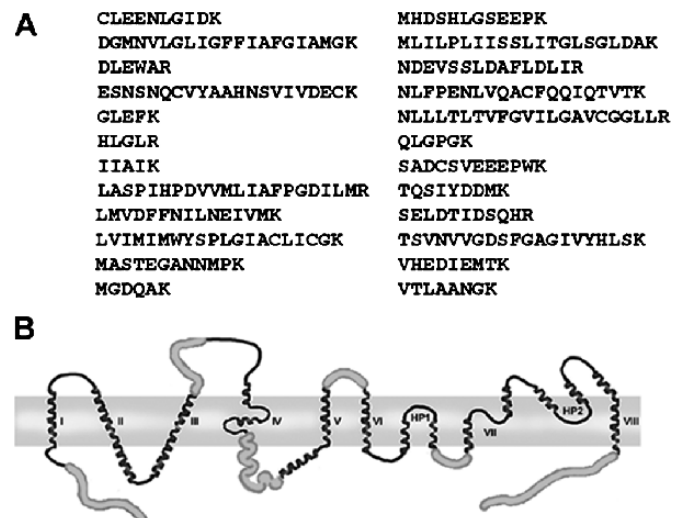

**FIGURE 1.** Detergent-insoluble excitatory amino acid transporter 2 (EAAT2) is present in Alzheimer disease (AD) frontal cortex. **(A)** A total of 348 EAAT2 tryptic fragments identified by liquid chromatography tandem mass spectrometry performed on Triton X-100–insoluble proteins from 5 AD patient cerebral cortex samples corresponded to the 24 unique EAAT2 sequences shown. **(B)** The EAAT2 tryptic fragments mapped to 6 primary structural regions indicated by gray highlighting located throughout the molecule. This EAAT2 model was modified from x-ray crystal structure results of Yernool et al (25). The primary transmembrane domains are indicated (I–VIII). Hairpin structures denoted as HP1 and HP2 form the glutamate-binding/gating domain.

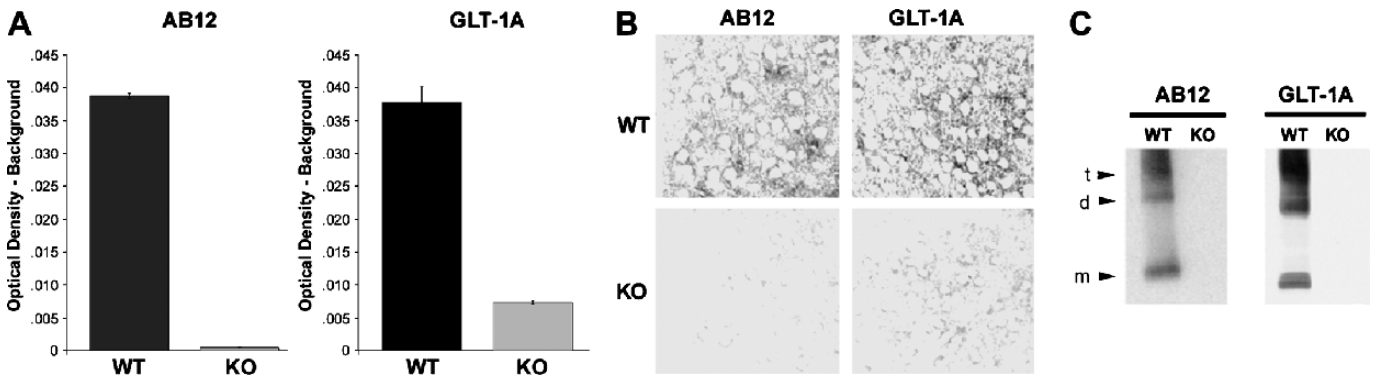

**FIGURE 2.** Specificity of excitatory amino acid transporter 2 (EAAT2) detection. Two different anti-EAAT2 antibodies (AB12 and GLT-1A that recognize the N- and C-terminal, respectively) were used. Pan-specific AB12 recognizes all EAAT2/GLT-1 isoforms; GLT-1A recognizes EAAT2a/GLT-1a, the most abundant EAAT2 isoform in cortex and hippocampus. Using brain tissue from GLT-1 wild-type (WT) and knockout (KO) mouse ELISAs (**A**), immunohistochemistry in cortex (**B**) and Western blots (**C**) prove the specificity of EAAT2/GLT-1 detection. The EAAT2/GLT-1 is a homotrimer that resolves as monomers (m), dimers (d), and apparent trimers (t) with approximate molecular weights of 70 kd, 150 kd, and more than 200 kd, respectively. Error bars in (**A**) indicate SEM of WT and KO brain tissue samples measured in triplicate.

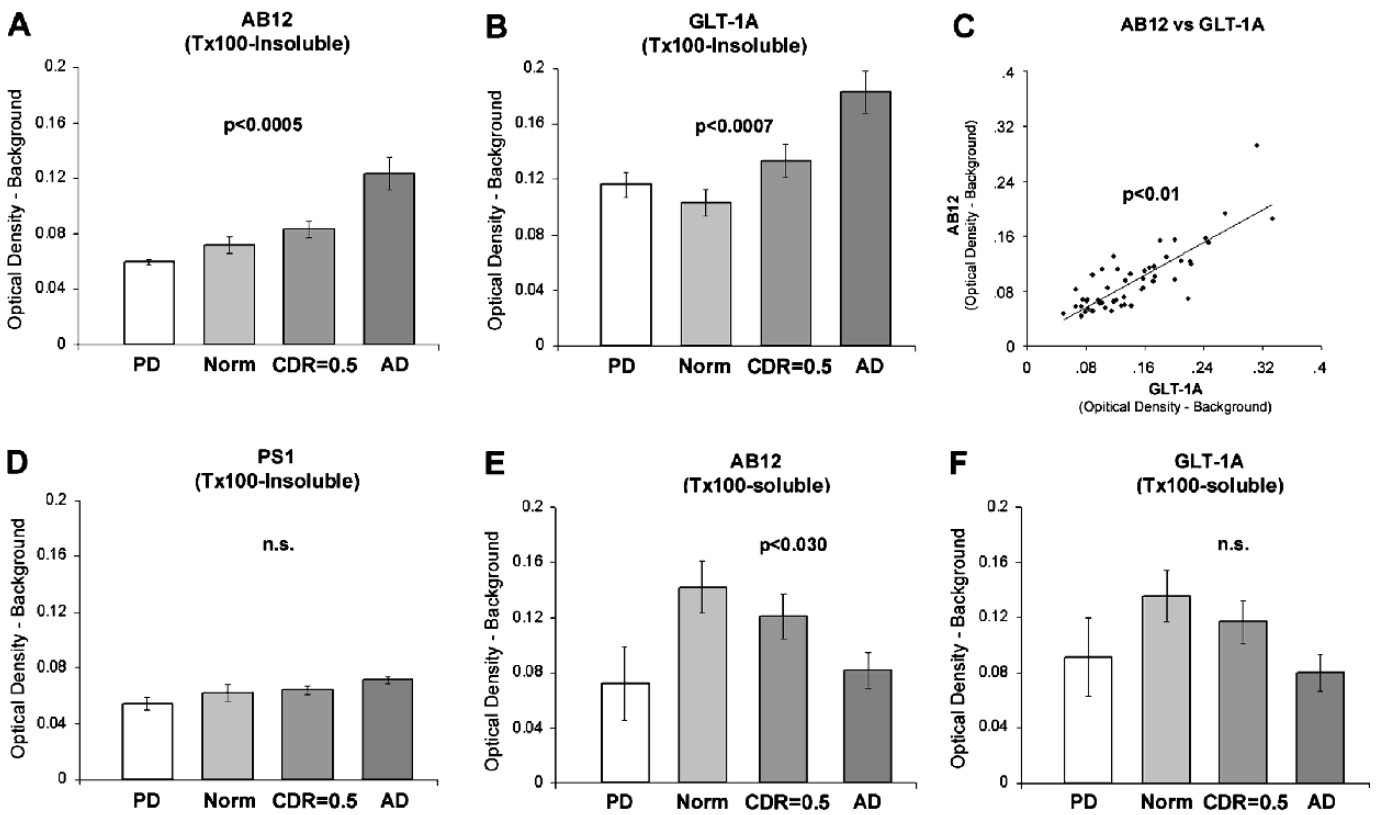

**FIGURE 3.** Detergent-insoluble excitatory amino acid transporter 2 (EAAT2) levels were increased in hippocampi of patients with Alzheimer disease (AD) pathology. (**A**) Total Triton X-100-insoluble proteins from Parkinson disease (PD, n = 4), normal control (Norm, n = 13), mild cognitive impairment (n = 14), and later-stage AD (n = 22) patients were solubilized with formic acid and analyzed by AB12 ELISAs to quantify detergent-insoluble EAAT2 levels. (**B**) Total Triton X-100-insoluble EAAT2 levels were measured by GLT-1A ELISAs as in (**A**). (**C**) Scatter plot shows a correlation between insoluble EAAT2 levels measured by AB12 and GLT-1A ELISAs for all subjects (n = 53). The p value indicates statistical significance determined by Pearson correlation. (**D**) Total Triton X-100-insoluble levels of presenilin-1 (PS1) were measured in the same samples as shown in (**A** and **B**). (**E, F**) Triton X-100-soluble EAAT2 levels from same samples as in (**A, B, and D**) were measured by AB12 and GLT-1A ELISAs, respectively. The p values (**A, B, D-F**) indicate results of overall single-factor analysis of variance. CDR, Clinical Dementia Rating; n.s., not significant.

whether EAAT2 detergent insolubility is elevated in AD, we developed 2 independent EAAT2 ELISAs. This approach was adopted to facilitate quantification of the relatively large number of samples to be tested (102 cortex and 53 hippocampus samples were measured in triplicate).

### Specificity of EAAT2 Detection

The AB12 is a polyclonal antibody that recognizes an amino-terminus epitope common to all EAAT2/GLT-1 isoforms; GLT-1A is a polyclonal antibody that recognizes the C-terminal domain of the dominant EAAT2 isoform expressed in the brain (20). These antibodies were tested under a variety of conditions using brain tissue from GLT-1 wild-type and GLT-1 knockout (KO) mice. Figure 2 shows that AB12 and GLT-1A selectively recognized EAAT2/GLT-1 by ELISA (Fig. 2A). In addition, we verified that EAAT2/GLT-1 levels measured by these ELISAs increased as a linear function of protein assayed (linear regression for AB12 ELISA:  $r^2 = 0.8799$ ,  $F_{1,23} = 168.6$ ,  $p < 0.0001$ ; GLT-1A ELISA:  $r^2 = 0.9567$ ,  $F_{1,23} = 507.8$ ,  $p < 0.00001$ ). The AB12 and GLT-

1A also detected GLT-1 by immunohistochemistry (Fig. 2B) and recognized Triton X-100-soluble GLT-1 via Western blots (Fig. 2C) from GLT-1 wild-type, but not GLT-1 KO, mice. These data prove that AB12 and GLT-1A specifically recognize EAAT2.

### Detergent-Insoluble EAAT2 Aberrantly Accumulates in AD

Frontal cortex and hippocampus tissue samples were serially extracted  $\times 3$  with Triton X-100 to remove detergent-soluble proteins, and residual detergent-insoluble proteins were then solubilized with formic acid. Neutralized formic acid-extracted proteins and the first Triton X-100-soluble fraction were analyzed by ELISAs to determine the relative levels of detergent-insoluble and detergent-soluble EAAT2.

In hippocampus samples, detergent-insoluble EAAT2 levels were elevated in AD patients compared with normal controls and PD patients, whereas detergent-insoluble EAAT2 levels in CDR = 0.5 patients were intermediately elevated between the controls and later-stage AD patients (Figs. 3A, B).

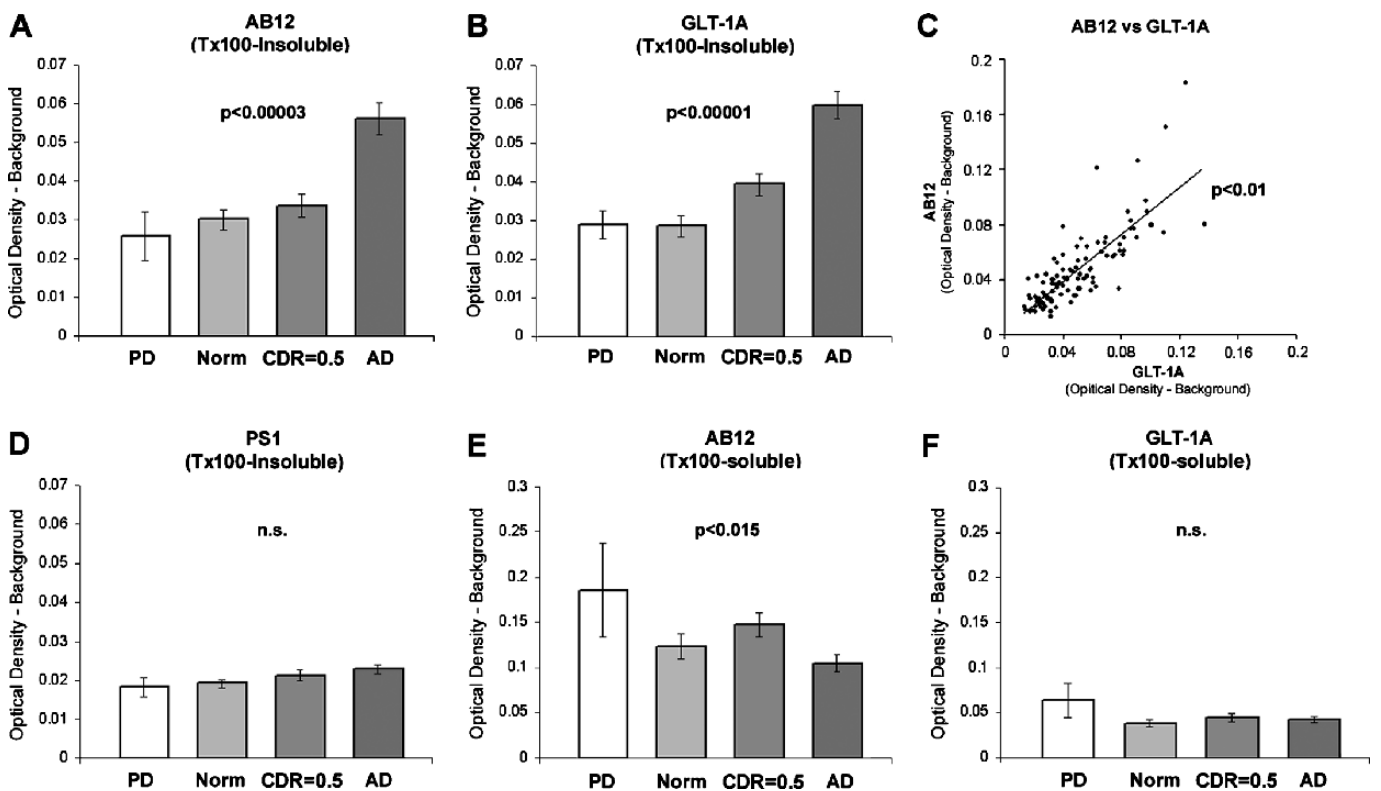

**FIGURE 4.** Detergent-insoluble excitatory amino acid transporter 2 (EAAT2) levels were increased in the frontal cortex of patients with Alzheimer disease (AD) pathology. **(A)** Total Triton X-100-insoluble proteins from Parkinson disease (PD,  $n = 4$ ), normal control (Norm,  $n = 20$ ), mild cognitive impairment ( $n = 23$ ), and later-stage AD ( $n = 55$ ) patients were solubilized with formic acid and analyzed by AB12 ELISA to quantify detergent-insoluble EAAT2 levels. **(B)** Total Triton X-100-insoluble EAAT2 levels were measured by GLT-1A ELISAs as in **(A)**. **(C)** Scatter plot shows a correlation between insoluble EAAT2 levels measured by AB12 and GLT-1A ELISAs for all subjects ( $n = 102$ ). The  $p$  value indicates statistical significance determined by Pearson correlation. **(D)** Total Triton X-100-insoluble levels of presenilin-1 (PS1) were measured in the same samples as shown **(A and B)**. **(E, F)** Triton X-100-soluble EAAT2 levels from the same samples as in **(A, B, and D)** were measured by AB12 and GLT-1A ELISAs, respectively. The  $p$  values in **(A, B, D–F)** indicate results of overall single-factor analysis of variance. CDR, Clinical Dementia Rating; n.s., not significant.

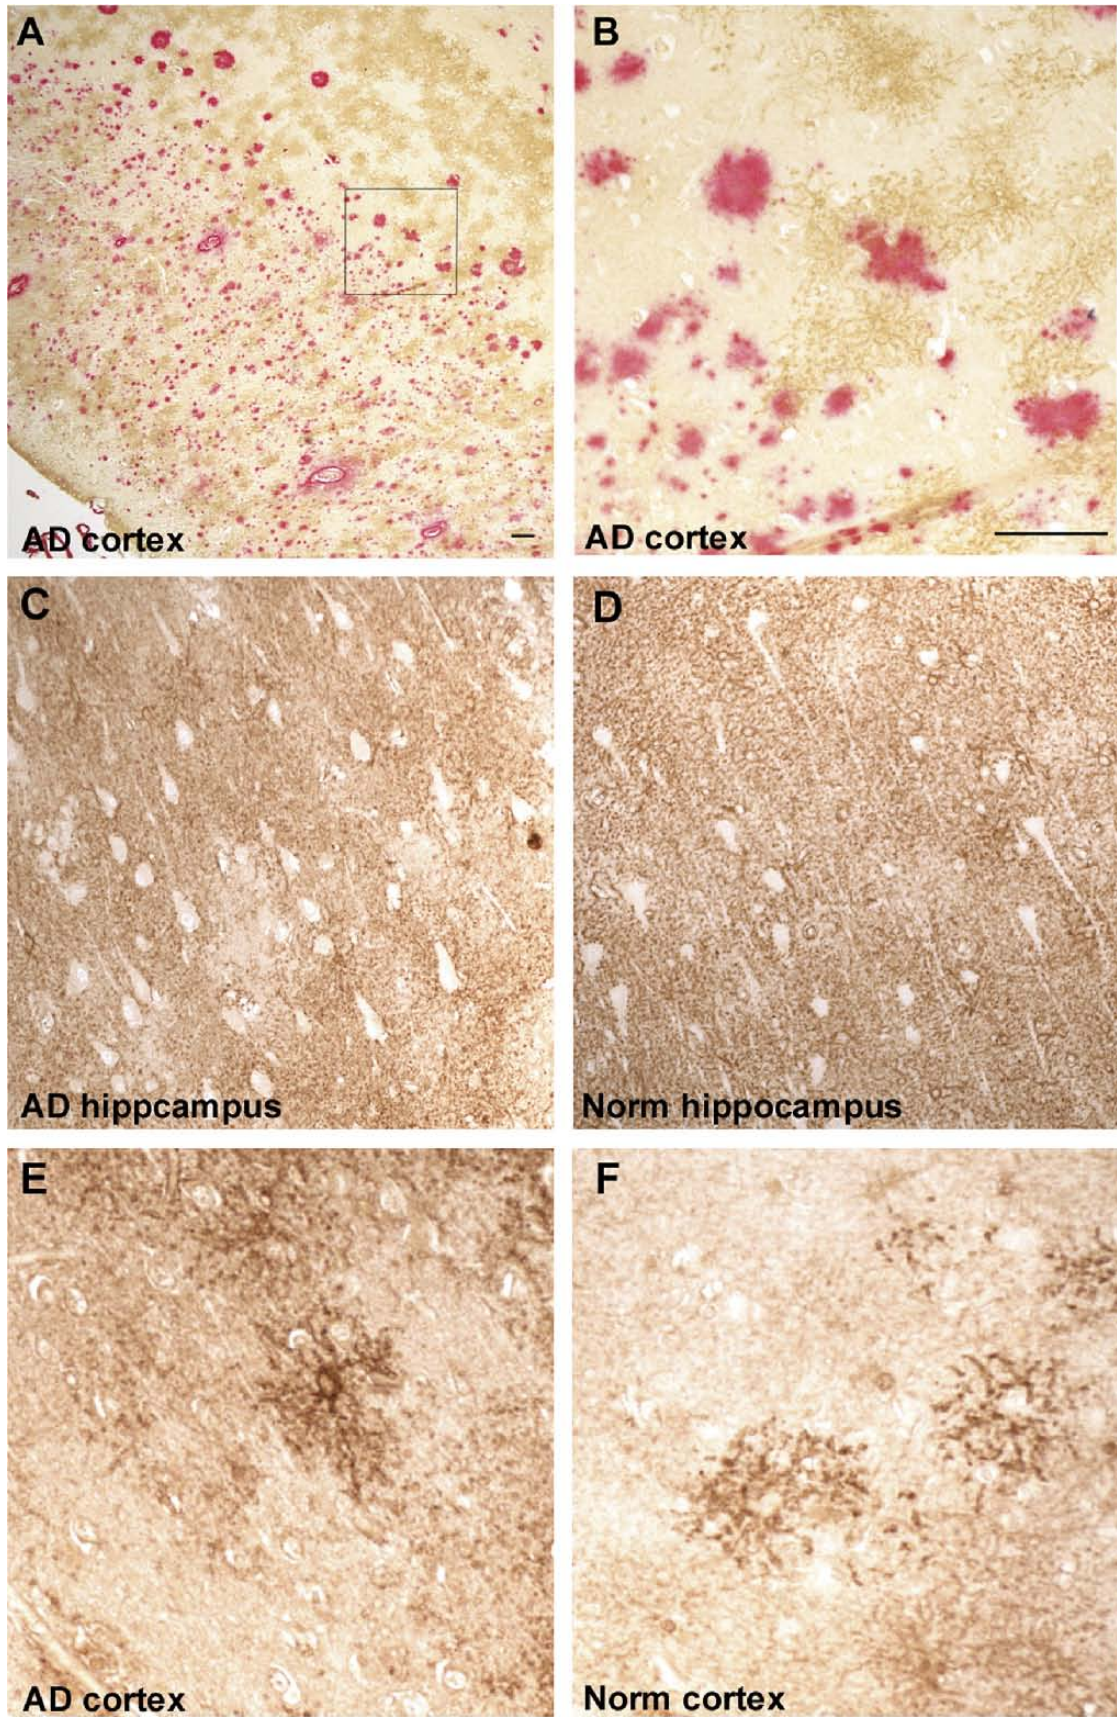

Downloaded from <https://academic.oup.com/jnen/article/69/7/667/2917172> by guest on 23 April 2024

These differences in detergent-insoluble EAAT2 levels among groups detected either with AB12 or GLT-1A ELISA were statistically significant ( $F_{3,49} = 7.107$ ,  $p < 0.0005$ ;  $F_{3,49} = 6.733$ ,  $p < 0.0007$ , respectively). These data suggest that EAAT2 becomes increasingly detergent-insoluble as AD-related pathology progresses from the less demented state to CDR = 0.5, and then becomes most pronounced by later-stage AD. A contrast analysis tested the prediction that detergent-insoluble EAAT2 levels followed a statistically significant trend where normal = PD < CDR = 0.5 < AD (AB12  $t_{49} = 3.685$ ,  $p < 0.001$ ; GLT-1A  $t_{49} = 3.353$ ,  $p < 0.002$ ). The scatter plot in Figure 3C shows that detergent-insoluble EAAT2 levels in hippocampus measured by AB12 and GLT-1A ELISAs were positively correlated ( $r = 0.820$ ,  $n = 53$ ,  $p < 0.01$ ), thereby confirming the close correspondence between 2 independent assays that shows that EAAT2 detergent insolubility increases as AD pathology increases.

In marked contrast to these findings, Triton X-100-insoluble PS1 levels (Fig. 3D) in the same samples did not differ among groups ( $F_{3,49} = 2.141$ , not significant [n.s.]). Presenilin-1 was chosen for comparison because it is localized prominently in astrocytes (26) that express approximately 80% of the EAAT2 in hippocampus and because overall PS1 expression levels are not affected by AD (27). These data argue that the detergent insolubility displayed by EAAT2 was not the result of generalized nonspecific cellular injury. Moreover, PS1 is structurally similar to EAAT2. Each molecule has 8 hydrophobic membrane-spanning domains with the N- and C-terminal domains localized intracellularly (27). Thus, the detergent insolubility profiles of EAAT2 obtained from the identical samples are unlikely to have arisen by nonspecific protein-protein interactions that might have occurred during the extraction process.

We also examined detergent-soluble EAAT2 levels in the same hippocampal samples (Figs. 3E, F). In contrast to the significant trend of increasing EAAT2 detergent insolubility, there was a statistically significant difference among groups in detergent-soluble EAAT2 levels detected by AB12 ELISAs ( $F_{3,49} = 3.237$ ,  $p < 0.030$ ); detergent-soluble EAAT2 levels seemed to decrease with increasing AD pathology. Differences in detergent-soluble EAAT2 levels detected by GLT-1A ELISAs were not statistically significant ( $F_{3,49} = 2.468$ , n.s.).

Because detergent-soluble EAAT2 levels were comparatively low in AD patients compared with normal controls

whereas the detergent-insoluble EAAT2 levels were markedly elevated in the same samples, it is highly unlikely that the increased detergent-insoluble EAAT2 measured in AD patients could have been caused by incomplete extraction of Triton X-100-soluble EAAT2 or that this reflects nonspecific EAAT2 associations with detergent-insoluble amyloid plaques or NFTs. This conclusion was further supported by the findings that detergent-soluble EAAT2 levels were not significantly correlated with detergent-insoluble A $\beta$  levels measured by 4G8 ELISAs (AB12 vs A $\beta$ :  $r = -0.167$ ,  $n = 53$ , n.s.; GLT-1A vs A $\beta$ :  $r = -0.162$ ,  $n = 53$ , n.s.). Similarly, detergent-soluble EAAT2 levels were not correlated with insoluble tau levels measured by tau-2 ELISAs (AB12 vs tau:  $r = -0.141$ ,  $n = 53$ , n.s.; GLT-1A vs tau:  $r = -0.131$ ,  $n = 53$ , n.s.). These findings argue against the possibility of nonaggregating EAAT2 in the lysates nonspecifically associated with the insoluble A $\beta$  or insoluble tau.

As in the hippocampi, Triton X-100-insoluble EAAT2 levels were markedly elevated in AD frontal cortex compared with PD and normal control subjects (Figs. 4A, B). Detergent-insoluble EAAT2 levels measured by GLT-1A ELISAs in CDR = 0.5 subjects again fell between controls and AD levels (Fig. 4B), whereas increased detergent-insoluble EAAT2 levels measured by AB12 ELISAs in CDR = 0.5 cortex were less pronounced (Fig. 4A). These differences in detergent-insoluble EAAT2 levels among groups were significant (AB12 ELISA:  $F_{3,98} = 8.743$ ,  $p < 0.00003$ ; GLT-1A ELISA:  $F_{3,98} = 13.375$ ,  $p < 0.00001$ ). Detergent-insoluble EAAT2 levels in frontal cortex (Figs. 4A, B) followed the predicted trend: controls = PD < CDR = 0.5 < AD, confirmed by statistically significant contrast test outcomes for both AB12 and GLT-1A ELISAs ( $t_{98} = 3.100$ ,  $p < 0.002$ ;  $t_{98} = 4.087$ ,  $p < 0.0001$ , respectively). Figure 4C shows a significant positive correlation between detergent-insoluble EAAT2 levels measured using AB12 versus GLT-1A ( $r = 0.801$ ,  $n = 102$ ,  $p < 0.01$ ). Triton X-100-insoluble PS1 levels in frontal cortex (Fig. 4D) did not significantly differ among groups ( $F_{3,98} = 1.651$ , n.s.). In contrast to hippocampus (Figs. 3E, F), detergent-soluble EAAT2 expression levels in the frontal cortex of normal controls, CDR = 0.5, and AD patients (Figs. 4E, F) were similar (AB12 ELISA:  $F_{3,98} = 3.669$ ,  $p < 0.015$ ; GLT-1A ELISA:  $F_{3,98} = 1.330$ , n.s.). Again, detergent-soluble EAAT2 levels in the frontal cortex did not correlate with the levels of detergent-insoluble A $\beta$  or tau measured in the same samples (AB12 vs A $\beta$ :  $r = -0.160$ ,  $n = 102$ , n.s.; GLT-1A vs A $\beta$ :  $r = -0.008$ ,  $n = 102$ , n.s.; AB12 vs tau:  $r = -0.105$ ,

**FIGURE 5.** Excitatory amino acid transporter 2 (EAAT2) immunohistochemistry (IHC) in Alzheimer disease (AD) and normal controls. **(A)** EAAT2 IHC using AB12 (brown) in AD frontal cortex reveals an irregular patchy astrocyte-like expression pattern that does not correspond with senile plaques immunostained red with the anti-amyloid- $\beta$  (A $\beta$ ) monoclonal antibody 4G8. **(B)** Higher magnification of the boxed region in **(A)** highlights the lack of correspondence between EAAT2 immunoreactivity and A $\beta$  deposits. Some plaques appeared to be surrounded by EAAT2 immunoreactivity, whereas other plaques were localized in EAAT2 immunonegative domains. **(C, D)** The EAAT2 was immunostained with AB12 (brown) in the hippocampal CA1 region of an AD **(C)** and a normal control (Norm **[D]**). The EAAT2 expression was primarily densely stained perisynaptic and extrasynaptic EAAT2-positive puncta in the neuropil. **(E)** Apparent astrocyte immunostained with AB12 in AD frontal cortex where proximal and distal glial processes and the cell body display EAAT2 immunoreactivity. Prominent EAAT2 immunostaining in astrocyte-like cell bodies was more readily detected in AD than in controls. **(F)** The AB12-immunostained apparent astrocytes in normal control revealed abundant EAAT2 immunoreactivity in proximal and distal processes, with less prominent cell body staining.

$n = 102$ , n.s.; GLT-1A vs tau:  $r = -0.049$ ,  $n = 102$ , n.s.), thus arguing against the possibility that incomplete extraction or nonspecific EAAT2 protein-protein interactions occurred during tissue processing.

### EAAT2 Localization Appears Comparatively Normal in AD

In normal brain tissue, EAAT2 is localized primarily, but not exclusively, in fine astrocytic processes that densely ramify throughout perisynaptic and extrasynaptic domains (28, 29). We performed immunohistochemistry to determine whether aberrant EAAT2 expression was localized near amyloid plaques, in association with NFTs, or aberrantly accumulated in neuronal or astrocytic cell bodies.

Double label immunostaining failed to reveal a consistent morphological association between EAAT2 expression and A $\beta$  deposits in AD, which argues against the idea that EAAT2 accumulated in association with senile plaques in vivo (Figs. 5A, B). In keeping with the predominantly astrocytic expression pattern characteristic of EAAT2, we found a paucity of EAAT2 immunoreactivity in neuronal cell bodies and dendritic processes in both AD and normal control brains (Figs. 5C, D). The primary morphologically neuron-like EAAT2 expression pattern observed was that associated with apparent neurofibrillary ghost tangles in AD subjects that immunostained weakly for EAAT2 (not shown). Thus, we found limited evidence that EAAT2 was prominently associated with NFTs, a finding consistent with the fact that NFTs are localized primarily in neurons but not in astrocytes in AD (30).

Close inspection of EAAT2 immunostaining revealed that EAAT2 was expressed in distal processes and to a lesser extent in cell bodies, both in AD and control brains. Nonetheless, astrocytes with prominent cell body EAAT2 immunostaining were more readily identified in AD frontal cortex than in normal control cortex (Figs. 5E, F). Despite this potentially interesting nonquantitative distinction between AD and control subjects, the overall immunohistochemical findings suggested that EAAT2 localization was not dramatically altered in AD patients compared with controls.

## DISCUSSION

### Aberrant EAAT2 Detergent Insolubility Is a Novel Biochemical Lesion in AD

Using 2 independent ELISA systems to measure detergent-insoluble EAAT2, along with corroborating mass spectrometry, we found that detergent-insoluble EAAT2 is aberrantly elevated in AD patient brains compared with controls and intermediately elevated in mildly impaired CDR = 0.5 patients with autopsy-confirmed early AD neuropathology. These data argue that EAAT2 detergent insolubility represents a progressive biochemical lesion of AD. The findings further suggest that EAAT2 belongs to a class of specific proteins (A $\beta$  and tau being the best-characterized examples) that displays altered detergent solubility in AD, whereas other proteins (31) (including PS1) do not. Our findings are in keeping with previous work showing that glial

fibrillary acidic protein becomes increasingly detergent insoluble in AD (31). Taken together, these findings support the idea that detergent insolubility is an aspect of the disease process not restricted to selective neuronal molecules, but also includes specific astrocytic proteins.

In contrast to detergent-insoluble EAAT2, detergent-soluble EAAT2 levels were reduced in AD patients compared with normal controls. These data are in keeping with previous human studies (6–8) and in findings from 2 AD mouse models (32, 33). Protein detergent insolubility does not seem to be recapitulated in AD mouse models (data not shown). Thus, although it is currently not possible to examine detergent insolubility in mice, the effects of AD-related pathology on soluble EAAT2/GLT-1 expression in AD patients and transgenic mice are nonetheless mutually supportive.

Our findings cannot address the mechanisms by which detergent-insoluble EAAT2 accumulates in AD. A potentially important insight comes from data showing that glutamate transporters are sensitive to biological conditions that promote reactive oxygen species (16, 34), and, significantly, oxidative stress is an early and persistent feature of AD (35). Posttranslational oxidative EAAT2 modifications inhibit glutamate uptake (16) and promote formation of detergent-insoluble high-molecular weight multimers (34). This correspondence between detergent insolubility and reduced uptake suggests the possibility that increased levels of detergent-insoluble EAAT2 observed in AD brain tissue may reflect increasing EAAT2 dysfunction. This idea is consistent with data showing that A $\beta$  generates oxidative radicals that impair glutamate uptake (36, 37). In addition, A $\beta$  impairs glutamate uptake in synaptosomes (9–13, 49).

Until recently, EAAT2 had been widely accepted as an astrocyte-specific glutamate transporter, but it is now clear that EAAT2 is also expressed by neurons (38). Such findings, in conjunction with a report that EAAT2 is sporadically expressed in tau-positive cortical and hippocampal neurons of some AD patients (39), raised the question as to whether increased AD-related detergent-insoluble EAAT2 reflects aberrant EAAT2 expression in neurons. We did observe EAAT2 immunoreactivity associated with apparent ghost tangles (neurofibrillary remnants of dead neurons), but the absence of EAAT2 perikaryon immunoreactivity in either AD or normal control patients was much more striking. These findings suggest that EAAT2 does not markedly accumulate in somal or proximal dendritic regions of neurons in AD. It seems more likely that detergent-insoluble EAAT2 complexes accumulate in fine perisynaptic distal astrocytic processes where most of EAAT2 is normally localized (28), but which are difficult to investigate by light microscopy. Our human postmortem specimens are not suitable for the electron microscopic approaches required to address this issue in a quantitative manner.

### EAATs Regulate Multiple Critical Neuroprotective Functions in the Brain and Are Disturbed in AD

A family of 5 Na<sup>+</sup>-dependent high-affinity glutamate transporters (referred to as EAAT1–5, also known as GLAST,



GLT-1, EAAC1, EAAT4, and EAAT5, respectively) carries out the critical task of clearing glutamate, primarily into astrocytes, thereby maintaining glutamate at basal extracellular concentrations that recently have been estimated to be in the low nanomolar range (40). The importance of rapid clearing extracellular glutamate is illustrated by the consequences of injecting potent glutamate transport blockers in mice that die quickly of apparent acute glutamate toxicity (41). The EAAT1, EAAT2, and neuron-specific EAAT3 are the primary glutamate transporters in the hippocampus and cortex; EAAT4 is expressed primarily in the cerebellum; and EAAT5 is expressed mostly in the retina (42). Of these transporters, EAAT2 is responsible for most glutamate clearance in the forebrain and accounts for approximately 80% of the glutamate transporters in the hippocampus (28, 29). The disproportionate expression of EAAT2 compared with other glutamate transporter subtypes is reflected by the dramatic phenotype of GLT-1 KO mice, which die shortly after birth because of seizures (2). The phenotypes of EAAT1/GLAST KO and EAAT3/EAAC1 KO mice are subtler. The EAAT1/GLAST KO mice develop normally but display defects in motor coordination related to cerebellar function (43). The EAAT3/EAAC1 KO mice also breed normally but develop age-related neuronal loss (44). Nonetheless, both EAAT1 and EAAT3 expressions are disturbed in AD (6, 44–46). Thus, in addition to EAAT2, multiple members of the Na<sup>+</sup>-dependent glutamate transporter family may contribute to AD-related pathogenic processes.

In addition to the critical role EAAT2 plays in preventing excitotoxicity (2), EAAT2 regulates stimulus-specific synaptic plasticity (5). The loss of EAAT2 has also been shown to impair activity-dependent glucose utilization (47). Impaired EAAT2 functions, even if initially latent or mild, may synergistically combine to promote increasingly pathogenic cycles of CNS dysfunction over time. In this regard, memantine, a drug hypothesized to temper excessive NMDA receptor activation, has efficacy in treating AD (48). Such findings lend additional credence to the notion that disturbed glutamatergic signaling may have a significant role in AD pathogenesis. Our present findings offer further evidence that glutamate-related dysfunction may be an important feature of AD pathology and suggest the possibility that strategies aimed at enhancing the natural neuroprotective properties of astrocytes may open new therapeutic opportunities to treat AD.

## REFERENCES

- Lipton SA. Pathologically activated therapeutics for neuroprotection. *Nat Rev Neurosci* 2007;8:803–8
- Tanaka K, Watase K, Manabe T, et al. Epilepsy and exacerbation of brain injury in mice lacking the glutamate transporter GLT-1. *Science* 1997;276:1699–702
- Namura S, Maeno H, Takami S, et al. Inhibition of glial glutamate transporter GLT-1 augments brain edema after transient focal cerebral ischemia in mice. *Neurosci Lett* 2002;324:117–20
- Pardo AC, Wong V, Benson LM, et al. Loss of the astrocyte glutamate transporter GLT1 modifies disease in SOD1(G93A) mice. *Exp Neurol* 2006;201:120–30
- Tsvetkov E, Shin RM, Bolshakov VY. Glutamate uptake determines pathway specificity of long-term potentiation in the neural circuitry of fear conditioning. *Neuron* 2004;41:139–51
- Jacob CP, Koutsilieris E, Bartl J, et al. Alterations in expression of glutamatergic transporters and receptors in sporadic Alzheimer's disease. *J Alzheimer's Dis* 2007;11:97–116
- Masliah E, Alford M, DeTeresa R, et al. Deficient glutamate transport is associated with neurodegeneration in Alzheimer's disease. *Ann Neurol* 1996;40:759–66
- Abdul HM, Sama MA, Furman JL, et al. Cognitive decline in Alzheimer's disease is associated with selective changes in calcineurin/NFAT signaling. *J Neurosci* 2009;29:12957–69
- Guo ZH, Mattson MP. Neurotrophic factors protect cortical synaptic terminals against amyloid and oxidative stress-induced impairment of glucose transport, glutamate transport and mitochondrial function. *Cereb Cortex* 2000;10:50–57
- Guo Z, Ersoz A, Butterfield DA, et al. Beneficial effects of dietary restriction on cerebral cortical synaptic terminals: Preservation of glucose and glutamate transport and mitochondrial function after exposure to amyloid  $\beta$ -peptide, iron, and 3-nitropropionic acid. *J Neurochem* 2000;75:314–20
- Keller JN, Pang Z, Geddes JW, et al. Impairment of glucose and glutamate transport and induction of mitochondrial oxidative stress and dysfunction in synaptosomes by amyloid  $\beta$ -peptide: Role of the lipid peroxidation product 4-hydroxynonenal. *J Neurochem* 1997;69:273–84
- Keller JN, Germeyer A, Begley JG, et al. 17 $\beta$ -Estradiol attenuates oxidative impairment of synaptic Na<sup>+</sup>/K<sup>+</sup>-ATPase activity, glucose transport, and glutamate transport induced by amyloid  $\beta$ -peptide and iron. *J Neurosci Res* 1997;50:522–30
- Lauderback CM, Hackett JM, Huang FF, et al. The glial glutamate transporter, GLT-1, is oxidatively modified by 4-hydroxy-2-nonenal in the Alzheimer's disease brain: The role of Abeta1-42. *J Neurochem* 2001;78:413–16
- Haugeto O, Ullensvang K, Levy LM, et al. Brain glutamate transporter proteins form homomultimers. *J Biol Chem* 1996;271:27715–22
- Trotti D, Rizzini BL, Rossi D, et al. Neuronal and glial glutamate transporters possess an SH-based redox regulatory mechanism. *Eur J Neurosci* 1997;9:1236–43
- Trotti D, Rossi D, Gjesdal O, et al. Peroxynitrite inhibits glutamate transporter subtypes. *J Biol Chem* 1996;271:5976–79
- Hughes CP, Berg L, Danziger WL, et al. A new clinical scale for the staging of dementia. *Br J Psychiatry* 1982;140:566–72
- Ball M, Braak H, Goethe J, et al. Consensus recommendations for the postmortem diagnosis of Alzheimer's disease. The National Institute on Aging, and Reagan Institute Working Group on Diagnostic Criteria for the Neuropathological Assessment of Alzheimer's Disease. *Neurobiol Aging* 1997;18:S1–S2
- Yang W, Woltjer RL, Sokal I, et al. Quantitative proteomics identifies surfactant-resistant  $\alpha$ -synuclein in cerebral cortex of parkinsonism-dementia complex of Guam but not Alzheimer's disease or progressive supranuclear palsy. *Am J Pathol* 2007;171:993–1002
- Williams SM, Sullivan RK, Scott HL, et al. Glial glutamate transporter expression patterns in brains from multiple mammalian species. *Glia* 2005;49:520–41
- Yang Y, Kinney GA, Spain WJ, et al. Presenilin-1 and intracellular calcium stores regulate neuronal glutamate uptake. *J Neurochem* 2004;88:1361–72
- Woltjer RL, Cimino PJ, Boutte AM, et al. Proteomic determination of widespread detergent-insolubility including A $\beta$  but not tau early in the pathogenesis of Alzheimer's disease. *FASEB J* 2005;19:1923–25
- Field A. *Discovering Statistics Using SPSS*. 2nd Ed. London, UK: Sage Publications, 2005:777
- Winer BJ, Brown DR, Michels KM. *Statistical Principles in Experimental Design*. 3rd Ed. New York, NY: McGraw-Hill Inc, 1991:1057
- Yernool D, Boudker O, Jin Y, et al. Structure of a glutamate transporter homologue from *Pyrococcus horikoshii*. *Nature* 2004;431:811–18
- Cribbs DH, Chen LS, Bende SM, et al. Widespread neuronal expression of the presenilin-1 early-onset Alzheimer's disease gene in the murine brain. *Am J Pathol* 1996;148:1797–806
- Johnston JA, Froelich S, Lannfelt L, Cowburn RF, et al. Quantification of presenilin-1 mRNA in Alzheimer's disease brains. *FEBS Lett* 1996;394:279–84
- Furness DN, Dehnes Y, Akhtar AQ, et al. A quantitative assessment of glutamate uptake into hippocampal synaptic terminals and astrocytes:

- New insights into a neuronal role for excitatory amino acid transporter 2 (EAAT2). *Neuroscience* 2008;157:80–94
29. Lehre KP, Danbolt NC. The number of glutamate transporter subtype molecules at glutamatergic synapses: Chemical and stereological quantification in young adult rat brain. *J Neurosci* 1998;18:8751–57
  30. Feany MB, Dickson DW. Neurodegenerative disorders with extensive tau pathology: A comparative study and review. *Ann Neurol* 1996;40:139–48
  31. Woltjer RL, Sonnen JA, Sokal I, et al. Quantitation and mapping of cerebral detergent-insoluble proteins in the elderly. *Brain Pathol* 2009;19:365–74
  32. Malm TM, Iivonen H, Goldsteins G, et al. Pyrrolidine dithiocarbamate activates Akt and improves spatial learning in APP/PS1 mice without affecting  $\beta$ -amyloid burden. *J Neurosci* 2007;27:3712–21
  33. Masliah E, Alford M, Mallory M, et al. Abnormal glutamate transport function in mutant amyloid precursor protein transgenic mice. *Exp Neurol* 2000;163:381–87
  34. Trotti D, Danbolt NC, Volterra A. Glutamate transporters are oxidant-vulnerable: A molecular link between oxidative and excitotoxic neurodegeneration? *Trends Pharmacol Sci* 1998;19:328–34
  35. Moreira PI, Santos MS, Oliveira CR, et al. Alzheimer disease and the role of free radicals in the pathogenesis of the disease. *CNS Neurol Disord Drug Targets* 2008;7:3–10
  36. Harris ME, Carney JM, Cole PS, et al.  $\beta$ -amyloid peptide-derived, oxygen-dependent free radicals inhibit glutamate uptake in cultured astrocytes: Implications for Alzheimer's disease. *Neuroreport* 1995;6:1875–79
  37. Harris ME, Wang Y, Pedigo NW Jr, et al. Amyloid  $\beta$  peptide (25–35) inhibits Na<sup>+</sup>-dependent glutamate uptake in rat hippocampal astrocyte cultures. *J Neurochem* 1996;67:277–86
  38. Chen W, Mahadomrongkul V, Berger UV, et al. The glutamate transporter GLT1a is expressed in excitatory axon terminals of mature hippocampal neurons. *J Neurosci* 2004;24:1136–48
  39. Thal DR. Excitatory amino acid transporter EAAT-2 in tangle-bearing neurons in Alzheimer's disease. *Brain Pathol* 2002;12:405–11
  40. Herman MA, Jahr CE. Extracellular glutamate concentration in hippocampal slice. *J Neurosci* 2007;27:9736–41
  41. Shimamoto K, Sakai R, Takaoka K, et al. Characterization of novel L-threo- $\beta$ -benzyloxyaspartate derivatives, potent blockers of the glutamate transporters. *Mol Pharmacol* 2004;65:1008–15
  42. Danbolt NC. Glutamate uptake. *Prog Neurobiol* 2001;65:1–105
  43. Watase K, Hashimoto K, Kano M, et al. Motor discoordination and increased susceptibility to cerebellar injury in GLAST mutant mice. *Eur J Neurosci* 1998;10:976–88
  44. Aoyama K, Suh SW, Hamby AM, et al. Neuronal glutathione deficiency and age-dependent neurodegeneration in the EAAC1 deficient mouse. *Nat Neurosci* 2006;9:119–26
  45. Duerson K, Woltjer RL, Mookherjee P, et al. Detergent-Insoluble EAAC1/EAAT3 aberrantly accumulates in hippocampal neurons of Alzheimer's disease patients. *Brain Pathol* 2009;19:267–78
  46. Scott HL, Pow DV, Tannenberg AE, et al. Aberrant expression of the glutamate transporter excitatory amino acid transporter 1 (EAAT1) in Alzheimer's disease. *J Neurosci* 2002;22:RC206
  47. Voutsinos-Porche B, Bonvento G, Tanaka K, et al. Glial glutamate transporters mediate a functional metabolic crosstalk between neurons and astrocytes in the mouse developing cortex. *Neuron* 2003;37:275–86
  48. Lipton SA. Paradigm shift in neuroprotection by NMDA receptor blockade: Memantine and beyond. *Nat Rev Drug Discov* 2006;5:160–70
  49. Li S, Hong S, Shepardson NE, et al. Soluble oligomers of amyloid-beta protein facilitate hippocampal long-term depression by disrupting neuronal glutamate uptake. *Neuron* 2009;62:788–801
